# Supplementary material
Source: Springer Nature journal article supplement (https://www.springermedizin.de/resource/supplementary/12885_2014_5176_MOESM7_ESM.pdf/9468398)

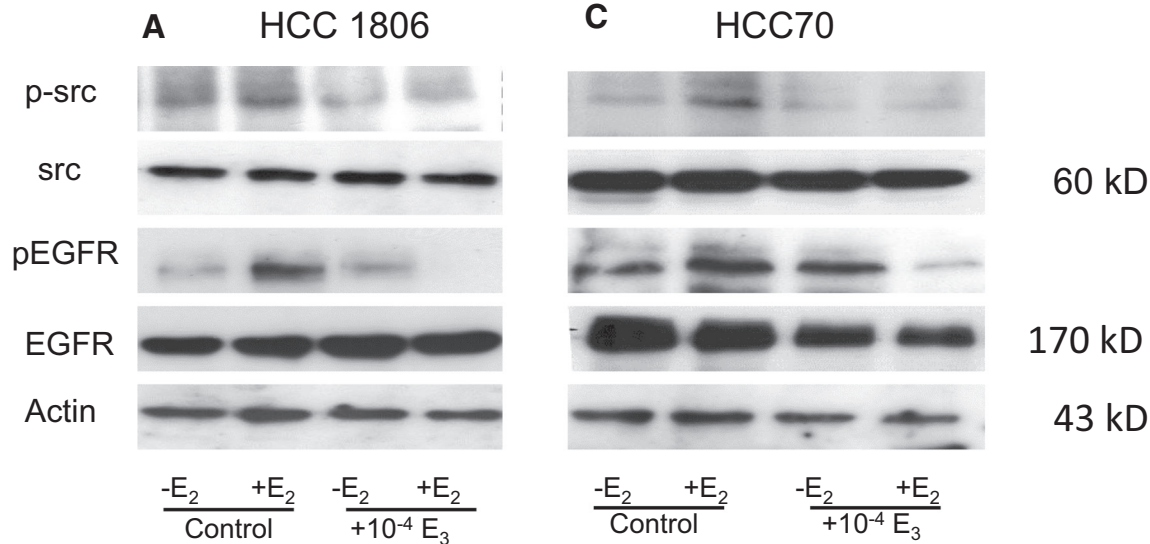

**HCC70**

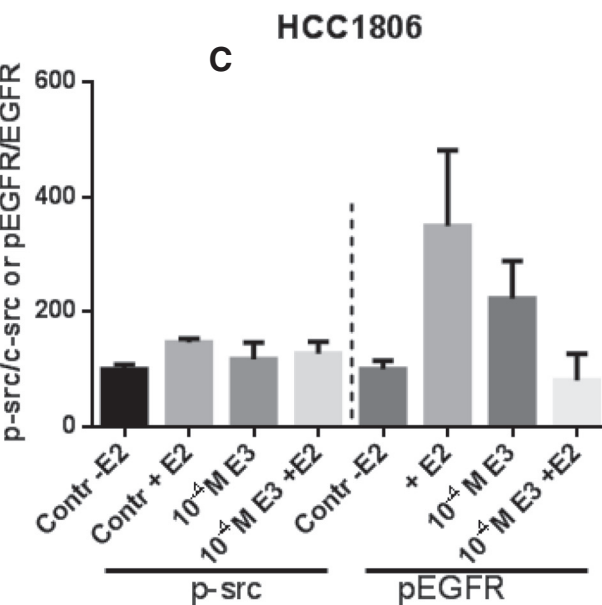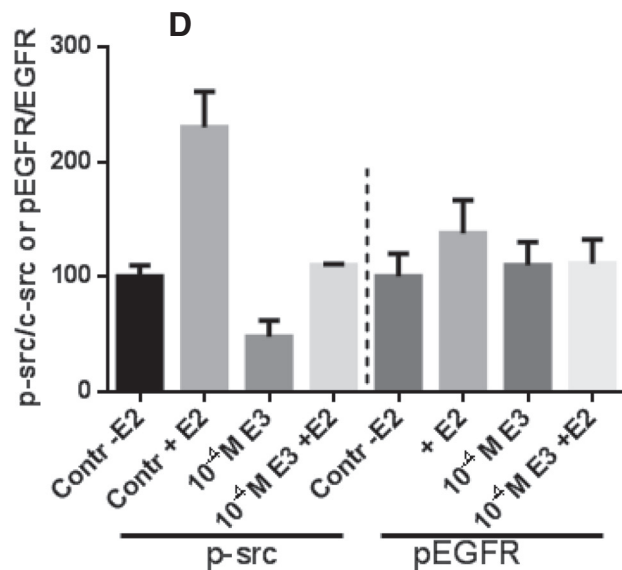

Supplement: MOESM7 [file 9468398]
